# Supplementary material for: Use of the energy waveform electrocardiogram to detect subclinical left ventricular dysfunction in patients with type 2 diabetes mellitus
Source: PubMed Central journal article supplement (PMC10918872; doi:10.1186/s12933-024-02141-1), 2024-03-06
Supplement: 12933_2024_2141_MOESM1_ESM.pdf [file 12933_2024_2141_MOESM1_ESM.pdf]

|              |                |            |       |                                                                             |
|--------------|----------------|------------|-------|-----------------------------------------------------------------------------|
| V1.Rsign     | Binary         | Binary     | N/A   | CWT: Polarity of the “R-wave” (0=negative, 1=positive).                     |
| V2.Rsign     | Binary         | Binary     | N/A   | CWT: Polarity of the “R-wave” (0=negative, 1=positive).                     |
| V3.Rsign     | Binary         | Binary     | N/A   | CWT: Polarity of the “R-wave” (0=negative, 1=positive).                     |
| V4.Rsign     | Binary         | Binary     | N/A   | CWT: Polarity of the “R-wave” (0=negative, 1=positive).                     |
| V5.Rsign     | Binary         | Binary     | N/A   | CWT: Polarity of the “R-wave” (0=negative, 1=positive).                     |
| V6.Rsign     | Binary         | Binary     | N/A   | CWT: Polarity of the “R-wave” (0=negative, 1=positive).                     |
| I.RAM        | Floating Point | Continuous | N/A   | CWT: RAM = (REM+RLM)/heartrate                                              |
| II.RAM       | Floating Point | Continuous | N/A   | CWT: RAM = (REM+RLM)/heartrate                                              |
| III.RAM      | Floating Point | Continuous | N/A   | CWT: RAM = (REM+RLM)/heartrate                                              |
| aVR.RAM      | Floating Point | Continuous | N/A   | CWT: RAM = (REM+RLM)/heartrate                                              |
| aVL.RAM      | Floating Point | Continuous | N/A   | CWT: RAM = (REM+RLM)/heartrate                                              |
| aVF.RAM      | Floating Point | Continuous | N/A   | CWT: RAM = (REM+RLM)/heartrate                                              |
| V1.RAM       | Floating Point | Continuous | N/A   | CWT: RAM = (REM+RLM)/heartrate                                              |
| V2.RAM       | Floating Point | Continuous | N/A   | CWT: RAM = (REM+RLM)/heartrate                                              |
| V3.RAM       | Floating Point | Continuous | N/A   | CWT: RAM = (REM+RLM)/heartrate                                              |
| V4.RAM       | Floating Point | Continuous | N/A   | CWT: RAM = (REM+RLM)/heartrate                                              |
| V5.RAM       | Floating Point | Continuous | N/A   | CWT: RAM = (REM+RLM)/heartrate                                              |
| V6.RAM       | Floating Point | Continuous | N/A   | CWT: RAM = (REM+RLM)/heartrate                                              |
| I.DAM        | Floating Point | Continuous | N/A   | CWT: DAM = (DOM+DPM+DTM)/heartrate                                          |
| II.DAM       | Floating Point | Continuous | N/A   | CWT: DAM = (DOM+DPM+DTM)/heartrate                                          |
| III.DAM      | Floating Point | Continuous | N/A   | CWT: DAM = (DOM+DPM+DTM)/heartrate                                          |
| aVR.DAM      | Floating Point | Continuous | N/A   | CWT: DAM = (DOM+DPM+DTM)/heartrate                                          |
| aVL.DAM      | Floating Point | Continuous | N/A   | CWT: DAM = (DOM+DPM+DTM)/heartrate                                          |
| aVF.DAM      | Floating Point | Continuous | N/A   | CWT: DAM = (DOM+DPM+DTM)/heartrate                                          |
| V1.DAM       | Floating Point | Continuous | N/A   | CWT: DAM = (DOM+DPM+DTM)/heartrate                                          |
| V2.DAM       | Floating Point | Continuous | N/A   | CWT: DAM = (DOM+DPM+DTM)/heartrate                                          |
| V3.DAM       | Floating Point | Continuous | N/A   | CWT: DAM = (DOM+DPM+DTM)/heartrate                                          |
| V4.DAM       | Floating Point | Continuous | N/A   | CWT: DAM = (DOM+DPM+DTM)/heartrate                                          |
| V5.DAM       | Floating Point | Continuous | N/A   | CWT: DAM = (DOM+DPM+DTM)/heartrate                                          |
| V6.DAM       | Floating Point | Continuous | N/A   | CWT: DAM = (DOM+DPM+DTM)/heartrate                                          |
| I.DRate      | Floating Point | Continuous | Ratio | CWT: Depolarization Repolarization Rate, DRRate = RAM/DAM                   |
| II.DRate     | Floating Point | Continuous | Ratio | CWT: Depolarization Repolarization Rate, DRRate = RAM/DAM                   |
| III.DRate    | Floating Point | Continuous | Ratio | CWT: Depolarization Repolarization Rate, DRRate = RAM/DAM                   |
| aVR.DRate    | Floating Point | Continuous | Ratio | CWT: Depolarization Repolarization Rate, DRRate = RAM/DAM                   |
| aVL.DRate    | Floating Point | Continuous | Ratio | CWT: Depolarization Repolarization Rate, DRRate = RAM/DAM                   |
| aVF.DRate    | Floating Point | Continuous | Ratio | CWT: Depolarization Repolarization Rate, DRRate = RAM/DAM                   |
| V1.DRate     | Floating Point | Continuous | Ratio | CWT: Depolarization Repolarization Rate, DRRate = RAM/DAM                   |
| V2.DRate     | Floating Point | Continuous | Ratio | CWT: Depolarization Repolarization Rate, DRRate = RAM/DAM                   |
| V3.DRate     | Floating Point | Continuous | Ratio | CWT: Depolarization Repolarization Rate, DRRate = RAM/DAM                   |
| V4.DRate     | Floating Point | Continuous | Ratio | CWT: Depolarization Repolarization Rate, DRRate = RAM/DAM                   |
| V5.DRate     | Floating Point | Continuous | Ratio | CWT: Depolarization Repolarization Rate, DRRate = RAM/DAM                   |
| V6.DRate     | Floating Point | Continuous | Ratio | CWT: Depolarization Repolarization Rate, DRRate = RAM/DAM                   |
| I.P21.sign   | Binary (Char)  | Binary     | Sign  | PowerSpectrum: Sign of Ratio of 2nd harmonic peak to the 1st harmonic peak. |
| II.P21.sign  | Binary (Char)  | Binary     | Sign  | PowerSpectrum: Sign of Ratio of 2nd harmonic peak to the 1st harmonic peak. |
| III.P21.sign | Binary (Char)  | Binary     | Sign  | PowerSpectrum: Sign of Ratio of 2nd harmonic peak to the 1st harmonic peak. |
| aVR.P21.sign | Binary (Char)  | Binary     | Sign  | PowerSpectrum: Sign of Ratio of 2nd harmonic peak to the 1st harmonic peak. |
| aVL.P21.sign | Binary (Char)  | Binary     | Sign  | PowerSpectrum: Sign of Ratio of 2nd harmonic peak to the 1st harmonic peak. |
| aVF.P21.sign | Binary (Char)  | Binary     | Sign  | PowerSpectrum: Sign of Ratio of 2nd harmonic peak to the 1st harmonic peak. |
| V1.P21.sign  | Binary (Char)  | Binary     | Sign  | PowerSpectrum: Sign of Ratio of 2nd harmonic peak to the 1st harmonic peak. |









|                                        |                |             |            |                                                                                                                                                                                                                                                |
|----------------------------------------|----------------|-------------|------------|------------------------------------------------------------------------------------------------------------------------------------------------------------------------------------------------------------------------------------------------|
| V5.LO3.value                           | Floating Point | Continuous  | Ratio      | PowerSpectrum: Ratio of 3rd harmonic energy to total energy.                                                                                                                                                                                   |
| V6.LO3.value                           | Floating Point | Continuous  | Ratio      | PowerSpectrum: Ratio of 3rd harmonic energy to total energy.                                                                                                                                                                                   |
| I.LOA.value                            | Floating Point | Continuous  | Ratio      | PowerSpectrum: Ratio of 1-4 harmonic energy to total energy.                                                                                                                                                                                   |
| II.LOA.value                           | Floating Point | Continuous  | Ratio      | PowerSpectrum: Ratio of 1-4 harmonic energy to total energy.                                                                                                                                                                                   |
| III.LOA.value                          | Floating Point | Continuous  | Ratio      | PowerSpectrum: Ratio of 1-4 harmonic energy to total energy.                                                                                                                                                                                   |
| aVR.LOA.value                          | Floating Point | Continuous  | Ratio      | PowerSpectrum: Ratio of 1-4 harmonic energy to total energy.                                                                                                                                                                                   |
| aVL.LOA.value                          | Floating Point | Continuous  | Ratio      | PowerSpectrum: Ratio of 1-4 harmonic energy to total energy.                                                                                                                                                                                   |
| aVF.LOA.value                          | Floating Point | Continuous  | Ratio      | PowerSpectrum: Ratio of 1-4 harmonic energy to total energy.                                                                                                                                                                                   |
| V1.LOA.value                           | Floating Point | Continuous  | Ratio      | PowerSpectrum: Ratio of 1-4 harmonic energy to total energy.                                                                                                                                                                                   |
| V2.LOA.value                           | Floating Point | Continuous  | Ratio      | PowerSpectrum: Ratio of 1-4 harmonic energy to total energy.                                                                                                                                                                                   |
| V3.LOA.value                           | Floating Point | Continuous  | Ratio      | PowerSpectrum: Ratio of 1-4 harmonic energy to total energy.                                                                                                                                                                                   |
| V4.LOA.value                           | Floating Point | Continuous  | Ratio      | PowerSpectrum: Ratio of 1-4 harmonic energy to total energy.                                                                                                                                                                                   |
| V5.LOA.value                           | Floating Point | Continuous  | Ratio      | PowerSpectrum: Ratio of 1-4 harmonic energy to total energy.                                                                                                                                                                                   |
| V6.LOA.value                           | Floating Point | Continuous  | Ratio      | PowerSpectrum: Ratio of 1-4 harmonic energy to total energy.                                                                                                                                                                                   |
| Glasgow Heart Rate                     | Integer        | Continuous  | bpm        | Heart Rate taken from ECG data (in beats-per-minute)                                                                                                                                                                                           |
| RR Interval                            | Integer        | Continuous  | ms         | Timing between beginning of QRS Complexes of two adjacent cardiac cycles. Inverse of Heart Rate (i.e. 1/HR).                                                                                                                                   |
| PR Interval                            | Integer        | Continuous  | ms         | Timing between P-onset and QRS onset.                                                                                                                                                                                                          |
| QRS Duration                           | Integer        | Continuous  | ms         | Timing between QRS onset and QRS termination.                                                                                                                                                                                                  |
| QT Interval                            | Integer        | Continuous  | ms         | Timing between QRS onset and T-wave end.                                                                                                                                                                                                       |
| QTc Interval                           | Integer        | Continuous  | ms         | Timing between QRS onset and T-wave end (corrected using Hodge's formula).                                                                                                                                                                     |
| P Axis                                 | Integer        | Continuous  | degrees    | Major direction of the overall electrical activity of the P-Wave (the frontal plane axes calculated from leads I and III using the algebraic sum of the amplitudes - all axes are calculated using sum of deflections in leads I and III)      |
| QRS Axis                               | Integer        | Continuous  | degrees    | Major direction of the overall electrical activity of the QRS Complex (the frontal plane axes calculated from leads I and III using the algebraic sum of the amplitudes - all axes are calculated using sum of deflections in leads I and III) |
| T Axis                                 | Integer        | Continuous  | degrees    | Major direction of the overall electrical activity of the T-Wave (the frontal plane axes calculated from leads I and III using the algebraic sum of the amplitudes - all axes are calculated using sum of deflections in leads I and III)      |
| QT Dispersion                          | Integer        | Continuous  | msec       | QT Dispersion (as calculated by Glasgow).                                                                                                                                                                                                      |
| Summary Group                          | Integer        | Categorical | N/A        | Glasgow statement group number (1-18 = text group number; 0 = block separation)                                                                                                                                                                |
| Summary Type                           | Integer        | Categorical | N/A        | Glasgow statement type (0 = reason; 1 = statement; 2 = additional statement)                                                                                                                                                                   |
| Summary Code                           | Integer        | Categorical | N/A        | Glasgow code of the reason, statement or the additional statement                                                                                                                                                                              |
| QrsFrontalAxis                         | Integer        | Continuous  | degrees    | QRS axis (frontal) INTEGER [-180,+180]                                                                                                                                                                                                         |
| STFrontalAxis                          | Integer        | Continuous  | degrees    | ST frontal axis, INT: -180 to +180 [degrees]                                                                                                                                                                                                   |
| Display Heart Rate                     | Integer        | Continuous  | bpm        |                                                                                                                                                                                                                                                |
| Sinus Rate                             | Integer        | Continuous  | bpm        |                                                                                                                                                                                                                                                |
| Ventricular Rate                       | Integer        | Continuous  | bpm        |                                                                                                                                                                                                                                                |
| Heart Rate Variability                 | Integer        | Continuous  | msec       |                                                                                                                                                                                                                                                |
| PFrontalAxis                           | Integer        | Continuous  | degrees    | P frontal axis, INT: -180 to +180 [degrees]                                                                                                                                                                                                    |
| TFrontalAxis                           | Integer        | Continuous  | degrees    | T frontal axis, INT: -180 to +180 [degrees]                                                                                                                                                                                                    |
| Sinus Average RR                       | Integer        | Continuous  | msec       | Average RR interval                                                                                                                                                                                                                            |
| Ventricular Average RR                 | Integer        | Continuous  | msec       |                                                                                                                                                                                                                                                |
| StdDev Normal RR Intervals             | Integer        | Continuous  | msec       |                                                                                                                                                                                                                                                |
| Qrs Pseudo Vector 4/8 Spatial Velocity | Integer        | Continuous  | uvolt/msec |                                                                                                                                                                                                                                                |
| Qrs Pseudo Vector 5/8 Spatial Velocity | Integer        | Continuous  | uvolt/msec |                                                                                                                                                                                                                                                |
| Qrs Pseudo Vector 6/8 Spatial Velocity | Integer        | Continuous  | uvolt/msec |                                                                                                                                                                                                                                                |
| Qrs Pseudo Vector 7/8 Spatial Velocity | Integer        | Continuous  | uvolt/msec |                                                                                                                                                                                                                                                |

|                                     |         |             |            |                                       |
|-------------------------------------|---------|-------------|------------|---------------------------------------|
| Qrs Pseudo Vector Maximum Amplitude | Integer | Continuous  | uvolt/msec | Max QRS spatial velocity (12 lead)    |
| LVH Score                           | Integer | Continuous  | N/A        |                                       |
| LV Strain                           | Binary  | Binary      | N/A        |                                       |
| ST Duration                         | Integer | Continuous  | msec       | Overall ST duration                   |
| PR Interval                         | Integer | Continuous  | msec       | Overall PR interval                   |
| QT Interval                         | Integer | Continuous  | msec       | Overall QT interval                   |
| QT Dispersion                       | Integer | Continuous  | msec       |                                       |
| QTc (used)                          | Integer | Continuous  | msec       | QTc (used by program)                 |
| QTc Formula (used)                  | String  | Categorical | N/A        | Hodge, Bazett, Fridericia, Framingham |
| P Terminal (V1)                     | Integer | Continuous  | uvolt/msec | P terminal force in V1                |
| QTc Hodge                           | Integer | Continuous  | msec       |                                       |
| QTc Bazett                          | Integer | Continuous  | msec       |                                       |
| QTc Fridericia                      | Integer | Continuous  | msec       |                                       |
| QTc Framingham                      | Integer | Continuous  | msec       |                                       |
| OverallPonset                       | Integer | Continuous  | msec       |                                       |
| OverallPtermination                 | Integer | Continuous  | msec       |                                       |
| OverallPduration                    | Integer | Continuous  | msec       |                                       |
| OverallQRSonset                     | Integer | Continuous  | msec       |                                       |
| OverallQRStermination               | Integer | Continuous  | msec       |                                       |
| OverallQRSduration                  | Integer | Continuous  | msec       |                                       |
| OverallTonset                       | Integer | Continuous  | msec       |                                       |
| OverallTtermination                 | Integer | Continuous  | msec       |                                       |
| OverallTduration                    | Integer | Continuous  | msec       |                                       |
| P waves found                       | String  | Binary      | Y/N        | Yes, No                               |
| Indeterminate QRS axis              | String  | Binary      | Y/N        | Yes, No                               |
| Default gender used                 | String  | Binary      | Y/N        | Yes, No                               |
| Default race used                   | String  | Binary      | Y/N        | Yes, No                               |
| Default age used                    | String  | Binary      | Y/N        | Yes, No                               |
| I. P Ons                            | Integer | Continuous  | msec       |                                       |
| I. P Dur                            | Integer | Continuous  | msec       |                                       |
| I. QRS Ons                          | Integer | Continuous  | msec       |                                       |
| I. QRS Dur                          | Integer | Continuous  | msec       |                                       |
| I. ST80 Amp                         | Integer | Continuous  | microvolts |                                       |
| I. Q Dur                            | Integer | Continuous  | msec       |                                       |
| I. R Dur                            | Integer | Continuous  | msec       |                                       |
| I. S Dur                            | Integer | Continuous  | msec       |                                       |
| I. R' Dur                           | Integer | Continuous  | msec       |                                       |
| I. S' Dur                           | Integer | Continuous  | msec       |                                       |
| I. R'' Dur                          | Integer | Continuous  | msec       |                                       |
| I. S'' Dur                          | Integer | Continuous  | msec       |                                       |
| I. ST Dur                           | Integer | Continuous  | msec       |                                       |
| I. T Ons                            | Integer | Continuous  | msec       |                                       |
| I. T Dur                            | Integer | Continuous  | msec       |                                       |
| I. P+ Dur                           | Integer | Continuous  | msec       |                                       |
| I. T+ Dur                           | Integer | Continuous  | msec       |                                       |
| I. QRS IntD                         | Integer | Continuous  | msec       |                                       |
| I. P+ Amp                           | Integer | Continuous  | microvolts |                                       |
| I. P- Amp                           | Integer | Continuous  | microvolts |                                       |
| I. P2P Amp                          | Integer | Continuous  | microvolts |                                       |

|              |         |             |               |                                       |
|--------------|---------|-------------|---------------|---------------------------------------|
| I. R1 Amp    | Integer | Continuous  | microvolts    |                                       |
| I. Q Amp     | Integer | Continuous  | microvolts    |                                       |
| I. R Amp     | Integer | Continuous  | microvolts    |                                       |
| I. S Amp     | Integer | Continuous  | microvolts    |                                       |
| I. R' Amp    | Integer | Continuous  | microvolts    |                                       |
| I. S' Amp    | Integer | Continuous  | microvolts    |                                       |
| I. R" Amp    | Integer | Continuous  | microvolts    |                                       |
| I. S" Amp    | Integer | Continuous  | microvolts    |                                       |
| I. ST Amp    | Integer | Continuous  | microvolts    |                                       |
| I. STT28 Amp | Integer | Continuous  | microvolts    |                                       |
| I. STT38 Amp | Integer | Continuous  | microvolts    |                                       |
| I. T+ Amp    | Integer | Continuous  | microvolts    |                                       |
| I. T- Amp    | Integer | Continuous  | microvolts    |                                       |
| I. QRS Area  | Integer | Continuous  | uvolt-msec/20 |                                       |
| I. P Area    | Integer | Continuous  | uvolt-msec/20 |                                       |
| I. T Area    | Integer | Continuous  | uvolt-msec/20 |                                       |
| I. P Morph   | Integer | Categorical | N/A           | P morphology (INT: -2 to +2)          |
| I. T Morph   | Integer | Categorical | N/A           | T morphology (INT: -2 to +2)          |
| I. R Notch   | Integer | Continuous  | N/A           | R wave notches                        |
| I. DeltaConf | Integer | Continuous  | percent       | Delta wave confidence (INT: 0 to 100) |
| I. ST Slope  | Integer | Continuous  | degrees       | ST slope (INT: - 90 to + 90)          |
| I. QT Int    | Integer | Continuous  | msec          | QT interval                           |
| II. P Ons    | Integer | Continuous  | msec          |                                       |
| II. P Dur    | Integer | Continuous  | msec          |                                       |
| II. QRS Ons  | Integer | Continuous  | msec          |                                       |
| II. QRS Dur  | Integer | Continuous  | msec          |                                       |
| II. ST80 Amp | Integer | Continuous  | microvolts    |                                       |
| II. Q Dur    | Integer | Continuous  | msec          |                                       |
| II. R Dur    | Integer | Continuous  | msec          |                                       |
| II. S Dur    | Integer | Continuous  | msec          |                                       |
| II. R' Dur   | Integer | Continuous  | msec          |                                       |
| II. S' Dur   | Integer | Continuous  | msec          |                                       |
| II. R" Dur   | Integer | Continuous  | msec          |                                       |
| II. S" Dur   | Integer | Continuous  | msec          |                                       |
| II. ST Dur   | Integer | Continuous  | msec          |                                       |
| II. T Ons    | Integer | Continuous  | msec          |                                       |
| II. T Dur    | Integer | Continuous  | msec          |                                       |
| II. P+ Dur   | Integer | Continuous  | msec          |                                       |
| II. T+ Dur   | Integer | Continuous  | msec          |                                       |
| II. QRS IntD | Integer | Continuous  | msec          |                                       |
| II. P+ Amp   | Integer | Continuous  | microvolts    |                                       |
| II. P- Amp   | Integer | Continuous  | microvolts    |                                       |
| II. P2P Amp  | Integer | Continuous  | microvolts    |                                       |
| II. R1 Amp   | Integer | Continuous  | microvolts    |                                       |
| II. Q Amp    | Integer | Continuous  | microvolts    |                                       |
| II. R Amp    | Integer | Continuous  | microvolts    |                                       |
| II. S Amp    | Integer | Continuous  | microvolts    |                                       |
| II. R' Amp   | Integer | Continuous  | microvolts    |                                       |
| II. S' Amp   | Integer | Continuous  | microvolts    |                                       |

|                |         |             |               |                                       |
|----------------|---------|-------------|---------------|---------------------------------------|
| II. R" Amp     | Integer | Continuous  | microvolts    |                                       |
| II. S" Amp     | Integer | Continuous  | microvolts    |                                       |
| II. ST Amp     | Integer | Continuous  | microvolts    |                                       |
| II. STT28 Amp  | Integer | Continuous  | microvolts    |                                       |
| II. STT38 Amp  | Integer | Continuous  | microvolts    |                                       |
| II. T+ Amp     | Integer | Continuous  | microvolts    |                                       |
| II. T- Amp     | Integer | Continuous  | microvolts    |                                       |
| II. QRS Area   | Integer | Continuous  | uvolt-msec/20 |                                       |
| II. P Area     | Integer | Continuous  | uvolt-msec/20 |                                       |
| II. T Area     | Integer | Continuous  | uvolt-msec/20 |                                       |
| II. P Morph    | Integer | Categorical | N/A           | P morphology (INT: -2 to +2)          |
| II. T Morph    | Integer | Categorical | N/A           | T morphology (INT: -2 to +2)          |
| II. R Notch    | Integer | Continuous  | N/A           | R wave notches                        |
| II. DeltaConf  | Integer | Continuous  | percent       | Delta wave confidence (INT: 0 to 100) |
| II. ST Slope   | Integer | Continuous  | degrees       | ST slope (INT: - 90 to + 90)          |
| II. QT Int     | Integer | Continuous  | msec          | QT interval                           |
| III. P Ons     | Integer | Continuous  | msec          |                                       |
| III. P Dur     | Integer | Continuous  | msec          |                                       |
| III. QRS Ons   | Integer | Continuous  | msec          |                                       |
| III. QRS Dur   | Integer | Continuous  | msec          |                                       |
| III. ST80 Amp  | Integer | Continuous  | microvolts    |                                       |
| III. Q Dur     | Integer | Continuous  | msec          |                                       |
| III. R Dur     | Integer | Continuous  | msec          |                                       |
| III. S Dur     | Integer | Continuous  | msec          |                                       |
| III. R' Dur    | Integer | Continuous  | msec          |                                       |
| III. S' Dur    | Integer | Continuous  | msec          |                                       |
| III. R" Dur    | Integer | Continuous  | msec          |                                       |
| III. S" Dur    | Integer | Continuous  | msec          |                                       |
| III. ST Dur    | Integer | Continuous  | msec          |                                       |
| III. T Ons     | Integer | Continuous  | msec          |                                       |
| III. T Dur     | Integer | Continuous  | msec          |                                       |
| III. P+ Dur    | Integer | Continuous  | msec          |                                       |
| III. T+ Dur    | Integer | Continuous  | msec          |                                       |
| III. QRS IntD  | Integer | Continuous  | msec          |                                       |
| III. P+ Amp    | Integer | Continuous  | microvolts    |                                       |
| III. P- Amp    | Integer | Continuous  | microvolts    |                                       |
| III. P2P Amp   | Integer | Continuous  | microvolts    |                                       |
| III. R1 Amp    | Integer | Continuous  | microvolts    |                                       |
| III. Q Amp     | Integer | Continuous  | microvolts    |                                       |
| III. R Amp     | Integer | Continuous  | microvolts    |                                       |
| III. S Amp     | Integer | Continuous  | microvolts    |                                       |
| III. R' Amp    | Integer | Continuous  | microvolts    |                                       |
| III. S' Amp    | Integer | Continuous  | microvolts    |                                       |
| III. R" Amp    | Integer | Continuous  | microvolts    |                                       |
| III. S" Amp    | Integer | Continuous  | microvolts    |                                       |
| III. ST Amp    | Integer | Continuous  | microvolts    |                                       |
| III. STT28 Amp | Integer | Continuous  | microvolts    |                                       |
| III. STT38 Amp | Integer | Continuous  | microvolts    |                                       |
| III. T+ Amp    | Integer | Continuous  | microvolts    |                                       |

|                |         |             |               |                                       |
|----------------|---------|-------------|---------------|---------------------------------------|
| III. T- Amp    | Integer | Continuous  | microvolts    |                                       |
| III. QRS Area  | Integer | Continuous  | uvolt-msec/20 |                                       |
| III. P Area    | Integer | Continuous  | uvolt-msec/20 |                                       |
| III. T Area    | Integer | Continuous  | uvolt-msec/20 |                                       |
| III. P Morph   | Integer | Categorical | N/A           | P morphology (INT: -2 to +2)          |
| III. T Morph   | Integer | Categorical | N/A           | T morphology (INT: -2 to +2)          |
| III. R Notch   | Integer | Continuous  | N/A           | R wave notches                        |
| III. DeltaConf | Integer | Continuous  | percent       | Delta wave confidence (INT: 0 to 100) |
| III. ST Slope  | Integer | Continuous  | degrees       | ST slope (INT: - 90 to + 90)          |
| III. QT Int    | Integer | Continuous  | msec          | QT interval                           |
| aVR. P Ons     | Integer | Continuous  | msec          |                                       |
| aVR. P Dur     | Integer | Continuous  | msec          |                                       |
| aVR. QRS Ons   | Integer | Continuous  | msec          |                                       |
| aVR. QRS Dur   | Integer | Continuous  | msec          |                                       |
| aVR. ST80 Amp  | Integer | Continuous  | microvolts    |                                       |
| aVR. Q Dur     | Integer | Continuous  | msec          |                                       |
| aVR. R Dur     | Integer | Continuous  | msec          |                                       |
| aVR. S Dur     | Integer | Continuous  | msec          |                                       |
| aVR. R' Dur    | Integer | Continuous  | msec          |                                       |
| aVR. S' Dur    | Integer | Continuous  | msec          |                                       |
| aVR. R'' Dur   | Integer | Continuous  | msec          |                                       |
| aVR. S'' Dur   | Integer | Continuous  | msec          |                                       |
| aVR. ST Dur    | Integer | Continuous  | msec          |                                       |
| aVR. T Ons     | Integer | Continuous  | msec          |                                       |
| aVR. T Dur     | Integer | Continuous  | msec          |                                       |
| aVR. P+ Dur    | Integer | Continuous  | msec          |                                       |
| aVR. T+ Dur    | Integer | Continuous  | msec          |                                       |
| aVR. QRS IntD  | Integer | Continuous  | msec          |                                       |
| aVR. P+ Amp    | Integer | Continuous  | microvolts    |                                       |
| aVR. P- Amp    | Integer | Continuous  | microvolts    |                                       |
| aVR. P2P Amp   | Integer | Continuous  | microvolts    |                                       |
| aVR. R1 Amp    | Integer | Continuous  | microvolts    |                                       |
| aVR. Q Amp     | Integer | Continuous  | microvolts    |                                       |
| aVR. R Amp     | Integer | Continuous  | microvolts    |                                       |
| aVR. S Amp     | Integer | Continuous  | microvolts    |                                       |
| aVR. R' Amp    | Integer | Continuous  | microvolts    |                                       |
| aVR. S' Amp    | Integer | Continuous  | microvolts    |                                       |
| aVR. R'' Amp   | Integer | Continuous  | microvolts    |                                       |
| aVR. S'' Amp   | Integer | Continuous  | microvolts    |                                       |
| aVR. ST Amp    | Integer | Continuous  | microvolts    |                                       |
| aVR. STT28 Amp | Integer | Continuous  | microvolts    |                                       |
| aVR. STT38 Amp | Integer | Continuous  | microvolts    |                                       |
| aVR. T+ Amp    | Integer | Continuous  | microvolts    |                                       |
| aVR. T- Amp    | Integer | Continuous  | microvolts    |                                       |
| aVR. QRS Area  | Integer | Continuous  | uvolt-msec/20 |                                       |
| aVR. P Area    | Integer | Continuous  | uvolt-msec/20 |                                       |
| aVR. T Area    | Integer | Continuous  | uvolt-msec/20 |                                       |
| aVR. P Morph   | Integer | Categorical | N/A           | P morphology (INT: -2 to +2)          |
| aVR. T Morph   | Integer | Categorical | N/A           | T morphology (INT: -2 to +2)          |



|                |         |             |               |                                       |
|----------------|---------|-------------|---------------|---------------------------------------|
| aVR. R Notch   | Integer | Continuous  | N/A           | R wave notches                        |
| aVR. DeltaConf | Integer | Continuous  | percent       | Delta wave confidence (INT: 0 to 100) |
| aVR. ST Slope  | Integer | Continuous  | degrees       | ST slope (INT: - 90 to + 90)          |
| aVR. QT Int    | Integer | Continuous  | msec          | QT interval                           |
| aVL. P Ons     | Integer | Continuous  | msec          |                                       |
| aVL. P Dur     | Integer | Continuous  | msec          |                                       |
| aVL. QRS Ons   | Integer | Continuous  | msec          |                                       |
| aVL. QRS Dur   | Integer | Continuous  | msec          |                                       |
| aVL. ST80 Amp  | Integer | Continuous  | microvolts    |                                       |
| aVL. Q Dur     | Integer | Continuous  | msec          |                                       |
| aVL. R Dur     | Integer | Continuous  | msec          |                                       |
| aVL. S Dur     | Integer | Continuous  | msec          |                                       |
| aVL. R' Dur    | Integer | Continuous  | msec          |                                       |
| aVL. S' Dur    | Integer | Continuous  | msec          |                                       |
| aVL. R" Dur    | Integer | Continuous  | msec          |                                       |
| aVL. S" Dur    | Integer | Continuous  | msec          |                                       |
| aVL. ST Dur    | Integer | Continuous  | msec          |                                       |
| aVL. T Ons     | Integer | Continuous  | msec          |                                       |
| aVL. T Dur     | Integer | Continuous  | msec          |                                       |
| aVL. P+ Dur    | Integer | Continuous  | msec          |                                       |
| aVL. T+ Dur    | Integer | Continuous  | msec          |                                       |
| aVL. QRS IntD  | Integer | Continuous  | msec          |                                       |
| aVL. P+ Amp    | Integer | Continuous  | microvolts    |                                       |
| aVL. P- Amp    | Integer | Continuous  | microvolts    |                                       |
| aVL. P2P Amp   | Integer | Continuous  | microvolts    |                                       |
| aVL. R1 Amp    | Integer | Continuous  | microvolts    |                                       |
| aVL. Q Amp     | Integer | Continuous  | microvolts    |                                       |
| aVL. R Amp     | Integer | Continuous  | microvolts    |                                       |
| aVL. S Amp     | Integer | Continuous  | microvolts    |                                       |
| aVL. R' Amp    | Integer | Continuous  | microvolts    |                                       |
| aVL. S' Amp    | Integer | Continuous  | microvolts    |                                       |
| aVL. R" Amp    | Integer | Continuous  | microvolts    |                                       |
| aVL. S" Amp    | Integer | Continuous  | microvolts    |                                       |
| aVL. ST Amp    | Integer | Continuous  | microvolts    |                                       |
| aVL. STT28 Amp | Integer | Continuous  | microvolts    |                                       |
| aVL. STT38 Amp | Integer | Continuous  | microvolts    |                                       |
| aVL. T+ Amp    | Integer | Continuous  | microvolts    |                                       |
| aVL. T- Amp    | Integer | Continuous  | microvolts    |                                       |
| aVL. QRS Area  | Integer | Continuous  | uvolt-msec/20 |                                       |
| aVL. P Area    | Integer | Continuous  | uvolt-msec/20 |                                       |
| aVL. T Area    | Integer | Continuous  | uvolt-msec/20 |                                       |
| aVL. P Morph   | Integer | Categorical | N/A           | P morphology (INT: -2 to +2)          |
| aVL. T Morph   | Integer | Categorical | N/A           | T morphology (INT: -2 to +2)          |
| aVL. R Notch   | Integer | Continuous  | N/A           | R wave notches                        |
| aVL. DeltaConf | Integer | Continuous  | percent       | Delta wave confidence (INT: 0 to 100) |
| aVL. ST Slope  | Integer | Continuous  | degrees       | ST slope (INT: - 90 to + 90)          |
| aVL. QT Int    | Integer | Continuous  | msec          | QT interval                           |
| aVF. P Ons     | Integer | Continuous  | msec          |                                       |
| aVF. P Dur     | Integer | Continuous  | msec          |                                       |

|                |         |             |               |                                       |
|----------------|---------|-------------|---------------|---------------------------------------|
| aVF. QRS Ons   | Integer | Continuous  | msec          |                                       |
| aVF. QRS Dur   | Integer | Continuous  | msec          |                                       |
| aVF. ST80 Amp  | Integer | Continuous  | microvolts    |                                       |
| aVF. Q Dur     | Integer | Continuous  | msec          |                                       |
| aVF. R Dur     | Integer | Continuous  | msec          |                                       |
| aVF. S Dur     | Integer | Continuous  | msec          |                                       |
| aVF. R' Dur    | Integer | Continuous  | msec          |                                       |
| aVF. S' Dur    | Integer | Continuous  | msec          |                                       |
| aVF. R'' Dur   | Integer | Continuous  | msec          |                                       |
| aVF. S'' Dur   | Integer | Continuous  | msec          |                                       |
| aVF. ST Dur    | Integer | Continuous  | msec          |                                       |
| aVF. T Ons     | Integer | Continuous  | msec          |                                       |
| aVF. T Dur     | Integer | Continuous  | msec          |                                       |
| aVF. P+ Dur    | Integer | Continuous  | msec          |                                       |
| aVF. T+ Dur    | Integer | Continuous  | msec          |                                       |
| aVF. QRS IntD  | Integer | Continuous  | msec          |                                       |
| aVF. P+ Amp    | Integer | Continuous  | microvolts    |                                       |
| aVF. P- Amp    | Integer | Continuous  | microvolts    |                                       |
| aVF. P2P Amp   | Integer | Continuous  | microvolts    |                                       |
| aVF. R1 Amp    | Integer | Continuous  | microvolts    |                                       |
| aVF. Q Amp     | Integer | Continuous  | microvolts    |                                       |
| aVF. R Amp     | Integer | Continuous  | microvolts    |                                       |
| aVF. S Amp     | Integer | Continuous  | microvolts    |                                       |
| aVF. R' Amp    | Integer | Continuous  | microvolts    |                                       |
| aVF. S' Amp    | Integer | Continuous  | microvolts    |                                       |
| aVF. R'' Amp   | Integer | Continuous  | microvolts    |                                       |
| aVF. S'' Amp   | Integer | Continuous  | microvolts    |                                       |
| aVF. ST Amp    | Integer | Continuous  | microvolts    |                                       |
| aVF. STT28 Amp | Integer | Continuous  | microvolts    |                                       |
| aVF. STT38 Amp | Integer | Continuous  | microvolts    |                                       |
| aVF. T+ Amp    | Integer | Continuous  | microvolts    |                                       |
| aVF. T- Amp    | Integer | Continuous  | microvolts    |                                       |
| aVF. QRS Area  | Integer | Continuous  | uvolt-msec/20 |                                       |
| aVF. P Area    | Integer | Continuous  | uvolt-msec/20 |                                       |
| aVF. T Area    | Integer | Continuous  | uvolt-msec/20 |                                       |
| aVF. P Morph   | Integer | Categorical | N/A           | P morphology (INT: -2 to +2)          |
| aVF. T Morph   | Integer | Categorical | N/A           | T morphology (INT: -2 to +2)          |
| aVF. R Notch   | Integer | Continuous  | N/A           | R wave notches                        |
| aVF. DeltaConf | Integer | Continuous  | percent       | Delta wave confidence (INT: 0 to 100) |
| aVF. ST Slope  | Integer | Continuous  | degrees       | ST slope (INT: - 90 to + 90)          |
| aVF. QT Int    | Integer | Continuous  | msec          | QT interval                           |
| V1. P Ons      | Integer | Continuous  | msec          |                                       |
| V1. P Dur      | Integer | Continuous  | msec          |                                       |
| V1. QRS Ons    | Integer | Continuous  | msec          |                                       |
| V1. QRS Dur    | Integer | Continuous  | msec          |                                       |
| V1. ST80 Amp   | Integer | Continuous  | microvolts    |                                       |
| V1. Q Dur      | Integer | Continuous  | msec          |                                       |
| V1. R Dur      | Integer | Continuous  | msec          |                                       |
| V1. S Dur      | Integer | Continuous  | msec          |                                       |

|               |         |             |               |                                       |
|---------------|---------|-------------|---------------|---------------------------------------|
| V1. R' Dur    | Integer | Continuous  | msec          |                                       |
| V1. S' Dur    | Integer | Continuous  | msec          |                                       |
| V1. R" Dur    | Integer | Continuous  | msec          |                                       |
| V1. S" Dur    | Integer | Continuous  | msec          |                                       |
| V1. ST Dur    | Integer | Continuous  | msec          |                                       |
| V1. T Ons     | Integer | Continuous  | msec          |                                       |
| V1. T Dur     | Integer | Continuous  | msec          |                                       |
| V1. P+ Dur    | Integer | Continuous  | msec          |                                       |
| V1. T+ Dur    | Integer | Continuous  | msec          |                                       |
| V1. QRS IntD  | Integer | Continuous  | msec          |                                       |
| V1. P+ Amp    | Integer | Continuous  | microvolts    |                                       |
| V1. P- Amp    | Integer | Continuous  | microvolts    |                                       |
| V1. P2P Amp   | Integer | Continuous  | microvolts    |                                       |
| V1. R1 Amp    | Integer | Continuous  | microvolts    |                                       |
| V1. Q Amp     | Integer | Continuous  | microvolts    |                                       |
| V1. R Amp     | Integer | Continuous  | microvolts    |                                       |
| V1. S Amp     | Integer | Continuous  | microvolts    |                                       |
| V1. R' Amp    | Integer | Continuous  | microvolts    |                                       |
| V1. S' Amp    | Integer | Continuous  | microvolts    |                                       |
| V1. R" Amp    | Integer | Continuous  | microvolts    |                                       |
| V1. S" Amp    | Integer | Continuous  | microvolts    |                                       |
| V1. ST Amp    | Integer | Continuous  | microvolts    |                                       |
| V1. STT28 Amp | Integer | Continuous  | microvolts    |                                       |
| V1. STT38 Amp | Integer | Continuous  | microvolts    |                                       |
| V1. T+ Amp    | Integer | Continuous  | microvolts    |                                       |
| V1. T- Amp    | Integer | Continuous  | microvolts    |                                       |
| V1. QRS Area  | Integer | Continuous  | uvolt-msec/20 |                                       |
| V1. P Area    | Integer | Continuous  | uvolt-msec/20 |                                       |
| V1. T Area    | Integer | Continuous  | uvolt-msec/20 |                                       |
| V1. P Morph   | Integer | Categorical | N/A           | P morphology (INT: -2 to +2)          |
| V1. T Morph   | Integer | Categorical | N/A           | T morphology (INT: -2 to +2)          |
| V1. R Notch   | Integer | Continuous  | N/A           | R wave notches                        |
| V1. DeltaConf | Integer | Continuous  | percent       | Delta wave confidence (INT: 0 to 100) |
| V1. ST Slope  | Integer | Continuous  | degrees       | ST slope (INT: - 90 to + 90)          |
| V1. QT Int    | Integer | Continuous  | msec          | QT interval                           |
| V2. P Ons     | Integer | Continuous  | msec          |                                       |
| V2. P Dur     | Integer | Continuous  | msec          |                                       |
| V2. QRS Ons   | Integer | Continuous  | msec          |                                       |
| V2. QRS Dur   | Integer | Continuous  | msec          |                                       |
| V2. ST80 Amp  | Integer | Continuous  | microvolts    |                                       |
| V2. Q Dur     | Integer | Continuous  | msec          |                                       |
| V2. R Dur     | Integer | Continuous  | msec          |                                       |
| V2. S Dur     | Integer | Continuous  | msec          |                                       |
| V2. R' Dur    | Integer | Continuous  | msec          |                                       |
| V2. S' Dur    | Integer | Continuous  | msec          |                                       |
| V2. R" Dur    | Integer | Continuous  | msec          |                                       |
| V2. S" Dur    | Integer | Continuous  | msec          |                                       |
| V2. ST Dur    | Integer | Continuous  | msec          |                                       |
| V2. T Ons     | Integer | Continuous  | msec          |                                       |

|               |         |             |               |                                       |
|---------------|---------|-------------|---------------|---------------------------------------|
| V2. T Dur     | Integer | Continuous  | msec          |                                       |
| V2. P+ Dur    | Integer | Continuous  | msec          |                                       |
| V2. T+ Dur    | Integer | Continuous  | msec          |                                       |
| V2. QRS IntD  | Integer | Continuous  | msec          |                                       |
| V2. P+ Amp    | Integer | Continuous  | microvolts    |                                       |
| V2. P- Amp    | Integer | Continuous  | microvolts    |                                       |
| V2. P2P Amp   | Integer | Continuous  | microvolts    |                                       |
| V2. R1 Amp    | Integer | Continuous  | microvolts    |                                       |
| V2. Q Amp     | Integer | Continuous  | microvolts    |                                       |
| V2. R Amp     | Integer | Continuous  | microvolts    |                                       |
| V2. S Amp     | Integer | Continuous  | microvolts    |                                       |
| V2. R' Amp    | Integer | Continuous  | microvolts    |                                       |
| V2. S' Amp    | Integer | Continuous  | microvolts    |                                       |
| V2. R" Amp    | Integer | Continuous  | microvolts    |                                       |
| V2. S" Amp    | Integer | Continuous  | microvolts    |                                       |
| V2. ST Amp    | Integer | Continuous  | microvolts    |                                       |
| V2. STT28 Amp | Integer | Continuous  | microvolts    |                                       |
| V2. STT38 Amp | Integer | Continuous  | microvolts    |                                       |
| V2. T+ Amp    | Integer | Continuous  | microvolts    |                                       |
| V2. T- Amp    | Integer | Continuous  | microvolts    |                                       |
| V2. QRS Area  | Integer | Continuous  | uvolt-msec/20 |                                       |
| V2. P Area    | Integer | Continuous  | uvolt-msec/20 |                                       |
| V2. T Area    | Integer | Continuous  | uvolt-msec/20 |                                       |
| V2. P Morph   | Integer | Categorical | N/A           | P morphology (INT: -2 to +2)          |
| V2. T Morph   | Integer | Categorical | N/A           | T morphology (INT: -2 to +2)          |
| V2. R Notch   | Integer | Continuous  | N/A           | R wave notches                        |
| V2. DeltaConf | Integer | Continuous  | percent       | Delta wave confidence (INT: 0 to 100) |
| V2. ST Slope  | Integer | Continuous  | degrees       | ST slope (INT: - 90 to + 90)          |
| V2. QT Int    | Integer | Continuous  | msec          | QT interval                           |
| V3. P Ons     | Integer | Continuous  | msec          |                                       |
| V3. P Dur     | Integer | Continuous  | msec          |                                       |
| V3. QRS Ons   | Integer | Continuous  | msec          |                                       |
| V3. QRS Dur   | Integer | Continuous  | msec          |                                       |
| V3. ST80 Amp  | Integer | Continuous  | microvolts    |                                       |
| V3. Q Dur     | Integer | Continuous  | msec          |                                       |
| V3. R Dur     | Integer | Continuous  | msec          |                                       |
| V3. S Dur     | Integer | Continuous  | msec          |                                       |
| V3. R' Dur    | Integer | Continuous  | msec          |                                       |
| V3. S' Dur    | Integer | Continuous  | msec          |                                       |
| V3. R" Dur    | Integer | Continuous  | msec          |                                       |
| V3. S" Dur    | Integer | Continuous  | msec          |                                       |
| V3. ST Dur    | Integer | Continuous  | msec          |                                       |
| V3. T Ons     | Integer | Continuous  | msec          |                                       |
| V3. T Dur     | Integer | Continuous  | msec          |                                       |
| V3. P+ Dur    | Integer | Continuous  | msec          |                                       |
| V3. T+ Dur    | Integer | Continuous  | msec          |                                       |
| V3. QRS IntD  | Integer | Continuous  | msec          |                                       |
| V3. P+ Amp    | Integer | Continuous  | microvolts    |                                       |
| V3. P- Amp    | Integer | Continuous  | microvolts    |                                       |

|               |         |             |               |                                       |
|---------------|---------|-------------|---------------|---------------------------------------|
| V3. P2P Amp   | Integer | Continuous  | microvolts    |                                       |
| V3. R1 Amp    | Integer | Continuous  | microvolts    |                                       |
| V3. Q Amp     | Integer | Continuous  | microvolts    |                                       |
| V3. R Amp     | Integer | Continuous  | microvolts    |                                       |
| V3. S Amp     | Integer | Continuous  | microvolts    |                                       |
| V3. R' Amp    | Integer | Continuous  | microvolts    |                                       |
| V3. S' Amp    | Integer | Continuous  | microvolts    |                                       |
| V3. R'' Amp   | Integer | Continuous  | microvolts    |                                       |
| V3. S'' Amp   | Integer | Continuous  | microvolts    |                                       |
| V3. ST Amp    | Integer | Continuous  | microvolts    |                                       |
| V3. STT28 Amp | Integer | Continuous  | microvolts    |                                       |
| V3. STT38 Amp | Integer | Continuous  | microvolts    |                                       |
| V3. T+ Amp    | Integer | Continuous  | microvolts    |                                       |
| V3. T- Amp    | Integer | Continuous  | microvolts    |                                       |
| V3. QRS Area  | Integer | Continuous  | uvolt-msec/20 |                                       |
| V3. P Area    | Integer | Continuous  | uvolt-msec/20 |                                       |
| V3. T Area    | Integer | Continuous  | uvolt-msec/20 |                                       |
| V3. P Morph   | Integer | Categorical | N/A           | P morphology (INT: -2 to +2)          |
| V3. T Morph   | Integer | Categorical | N/A           | T morphology (INT: -2 to +2)          |
| V3. R Notch   | Integer | Continuous  | N/A           | R wave notches                        |
| V3. DeltaConf | Integer | Continuous  | percent       | Delta wave confidence (INT: 0 to 100) |
| V3. ST Slope  | Integer | Continuous  | degrees       | ST slope (INT: - 90 to + 90)          |
| V3. QT Int    | Integer | Continuous  | msec          | QT interval                           |
| V4. P Ons     | Integer | Continuous  | msec          |                                       |
| V4. P Dur     | Integer | Continuous  | msec          |                                       |
| V4. QRS Ons   | Integer | Continuous  | msec          |                                       |
| V4. QRS Dur   | Integer | Continuous  | msec          |                                       |
| V4. ST80 Amp  | Integer | Continuous  | microvolts    |                                       |
| V4. Q Dur     | Integer | Continuous  | msec          |                                       |
| V4. R Dur     | Integer | Continuous  | msec          |                                       |
| V4. S Dur     | Integer | Continuous  | msec          |                                       |
| V4. R' Dur    | Integer | Continuous  | msec          |                                       |
| V4. S' Dur    | Integer | Continuous  | msec          |                                       |
| V4. R'' Dur   | Integer | Continuous  | msec          |                                       |
| V4. S'' Dur   | Integer | Continuous  | msec          |                                       |
| V4. ST Dur    | Integer | Continuous  | msec          |                                       |
| V4. T Ons     | Integer | Continuous  | msec          |                                       |
| V4. T Dur     | Integer | Continuous  | msec          |                                       |
| V4. P+ Dur    | Integer | Continuous  | msec          |                                       |
| V4. T+ Dur    | Integer | Continuous  | msec          |                                       |
| V4. QRS IntD  | Integer | Continuous  | msec          |                                       |
| V4. P+ Amp    | Integer | Continuous  | microvolts    |                                       |
| V4. P- Amp    | Integer | Continuous  | microvolts    |                                       |
| V4. P2P Amp   | Integer | Continuous  | microvolts    |                                       |
| V4. R1 Amp    | Integer | Continuous  | microvolts    |                                       |
| V4. Q Amp     | Integer | Continuous  | microvolts    |                                       |
| V4. R Amp     | Integer | Continuous  | microvolts    |                                       |
| V4. S Amp     | Integer | Continuous  | microvolts    |                                       |
| V4. R' Amp    | Integer | Continuous  | microvolts    |                                       |

|               |         |             |               |                                       |
|---------------|---------|-------------|---------------|---------------------------------------|
| V4. S' Amp    | Integer | Continuous  | microvolts    |                                       |
| V4. R" Amp    | Integer | Continuous  | microvolts    |                                       |
| V4. S" Amp    | Integer | Continuous  | microvolts    |                                       |
| V4. ST Amp    | Integer | Continuous  | microvolts    |                                       |
| V4. STT28 Amp | Integer | Continuous  | microvolts    |                                       |
| V4. STT38 Amp | Integer | Continuous  | microvolts    |                                       |
| V4. T+ Amp    | Integer | Continuous  | microvolts    |                                       |
| V4. T- Amp    | Integer | Continuous  | microvolts    |                                       |
| V4. QRS Area  | Integer | Continuous  | uvolt-msec/20 |                                       |
| V4. P Area    | Integer | Continuous  | uvolt-msec/20 |                                       |
| V4. T Area    | Integer | Continuous  | uvolt-msec/20 |                                       |
| V4. P Morph   | Integer | Categorical | N/A           | P morphology (INT: -2 to +2)          |
| V4. T Morph   | Integer | Categorical | N/A           | T morphology (INT: -2 to +2)          |
| V4. R Notch   | Integer | Continuous  | N/A           | R wave notches                        |
| V4. DeltaConf | Integer | Continuous  | percent       | Delta wave confidence (INT: 0 to 100) |
| V4. ST Slope  | Integer | Continuous  | degrees       | ST slope (INT: - 90 to + 90)          |
| V4. QT Int    | Integer | Continuous  | msec          | QT interval                           |
| V5. P Ons     | Integer | Continuous  | msec          |                                       |
| V5. P Dur     | Integer | Continuous  | msec          |                                       |
| V5. QRS Ons   | Integer | Continuous  | msec          |                                       |
| V5. QRS Dur   | Integer | Continuous  | msec          |                                       |
| V5. ST80 Amp  | Integer | Continuous  | microvolts    |                                       |
| V5. Q Dur     | Integer | Continuous  | msec          |                                       |
| V5. R Dur     | Integer | Continuous  | msec          |                                       |
| V5. S Dur     | Integer | Continuous  | msec          |                                       |
| V5. R' Dur    | Integer | Continuous  | msec          |                                       |
| V5. S' Dur    | Integer | Continuous  | msec          |                                       |
| V5. R" Dur    | Integer | Continuous  | msec          |                                       |
| V5. S" Dur    | Integer | Continuous  | msec          |                                       |
| V5. ST Dur    | Integer | Continuous  | msec          |                                       |
| V5. T Ons     | Integer | Continuous  | msec          |                                       |
| V5. T Dur     | Integer | Continuous  | msec          |                                       |
| V5. P+ Dur    | Integer | Continuous  | msec          |                                       |
| V5. T+ Dur    | Integer | Continuous  | msec          |                                       |
| V5. QRS IntD  | Integer | Continuous  | msec          |                                       |
| V5. P+ Amp    | Integer | Continuous  | microvolts    |                                       |
| V5. P- Amp    | Integer | Continuous  | microvolts    |                                       |
| V5. P2P Amp   | Integer | Continuous  | microvolts    |                                       |
| V5. R1 Amp    | Integer | Continuous  | microvolts    |                                       |
| V5. Q Amp     | Integer | Continuous  | microvolts    |                                       |
| V5. R Amp     | Integer | Continuous  | microvolts    |                                       |
| V5. S Amp     | Integer | Continuous  | microvolts    |                                       |
| V5. R' Amp    | Integer | Continuous  | microvolts    |                                       |
| V5. S' Amp    | Integer | Continuous  | microvolts    |                                       |
| V5. R" Amp    | Integer | Continuous  | microvolts    |                                       |
| V5. S" Amp    | Integer | Continuous  | microvolts    |                                       |
| V5. ST Amp    | Integer | Continuous  | microvolts    |                                       |
| V5. STT28 Amp | Integer | Continuous  | microvolts    |                                       |
| V5. STT38 Amp | Integer | Continuous  | microvolts    |                                       |

|               |         |             |               |                                       |
|---------------|---------|-------------|---------------|---------------------------------------|
| V5. T+ Amp    | Integer | Continuous  | microvolts    |                                       |
| V5. T- Amp    | Integer | Continuous  | microvolts    |                                       |
| V5. QRS Area  | Integer | Continuous  | uvolt-msec/20 |                                       |
| V5. P Area    | Integer | Continuous  | uvolt-msec/20 |                                       |
| V5. T Area    | Integer | Continuous  | uvolt-msec/20 |                                       |
| V5. P Morph   | Integer | Categorical | N/A           | P morphology (INT: -2 to +2)          |
| V5. T Morph   | Integer | Categorical | N/A           | T morphology (INT: -2 to +2)          |
| V5. R Notch   | Integer | Continuous  | N/A           | R wave notches                        |
| V5. DeltaConf | Integer | Continuous  | percent       | Delta wave confidence (INT: 0 to 100) |
| V5. ST Slope  | Integer | Continuous  | degrees       | ST slope (INT: - 90 to + 90)          |
| V5. QT Int    | Integer | Continuous  | msec          | QT interval                           |
| V6. P Ons     | Integer | Continuous  | msec          |                                       |
| V6. P Dur     | Integer | Continuous  | msec          |                                       |
| V6. QRS Ons   | Integer | Continuous  | msec          |                                       |
| V6. QRS Dur   | Integer | Continuous  | msec          |                                       |
| V6. ST80 Amp  | Integer | Continuous  | microvolts    |                                       |
| V6. Q Dur     | Integer | Continuous  | msec          |                                       |
| V6. R Dur     | Integer | Continuous  | msec          |                                       |
| V6. S Dur     | Integer | Continuous  | msec          |                                       |
| V6. R' Dur    | Integer | Continuous  | msec          |                                       |
| V6. S' Dur    | Integer | Continuous  | msec          |                                       |
| V6. R" Dur    | Integer | Continuous  | msec          |                                       |
| V6. S" Dur    | Integer | Continuous  | msec          |                                       |
| V6. ST Dur    | Integer | Continuous  | msec          |                                       |
| V6. T Ons     | Integer | Continuous  | msec          |                                       |
| V6. T Dur     | Integer | Continuous  | msec          |                                       |
| V6. P+ Dur    | Integer | Continuous  | msec          |                                       |
| V6. T+ Dur    | Integer | Continuous  | msec          |                                       |
| V6. QRS IntD  | Integer | Continuous  | msec          |                                       |
| V6. P+ Amp    | Integer | Continuous  | microvolts    |                                       |
| V6. P- Amp    | Integer | Continuous  | microvolts    |                                       |
| V6. P2P Amp   | Integer | Continuous  | microvolts    |                                       |
| V6. R1 Amp    | Integer | Continuous  | microvolts    |                                       |
| V6. Q Amp     | Integer | Continuous  | microvolts    |                                       |
| V6. R Amp     | Integer | Continuous  | microvolts    |                                       |
| V6. S Amp     | Integer | Continuous  | microvolts    |                                       |
| V6. R' Amp    | Integer | Continuous  | microvolts    |                                       |
| V6. S' Amp    | Integer | Continuous  | microvolts    |                                       |
| V6. R" Amp    | Integer | Continuous  | microvolts    |                                       |
| V6. S" Amp    | Integer | Continuous  | microvolts    |                                       |
| V6. ST Amp    | Integer | Continuous  | microvolts    |                                       |
| V6. STT28 Amp | Integer | Continuous  | microvolts    |                                       |
| V6. STT38 Amp | Integer | Continuous  | microvolts    |                                       |
| V6. T+ Amp    | Integer | Continuous  | microvolts    |                                       |
| V6. T- Amp    | Integer | Continuous  | microvolts    |                                       |
| V6. QRS Area  | Integer | Continuous  | uvolt-msec/20 |                                       |
| V6. P Area    | Integer | Continuous  | uvolt-msec/20 |                                       |
| V6. T Area    | Integer | Continuous  | uvolt-msec/20 |                                       |
| V6. P Morph   | Integer | Categorical | N/A           | P morphology (INT: -2 to +2)          |

|               |         |             |         |                                       |
|---------------|---------|-------------|---------|---------------------------------------|
| V6. T Morph   | Integer | Categorical | N/A     | T morphology (INT: -2 to +2)          |
| V6. R Notch   | Integer | Continuous  | N/A     | R wave notches                        |
| V6. DeltaConf | Integer | Continuous  | percent | Delta wave confidence (INT: 0 to 100) |
| V6. ST Slope  | Integer | Continuous  | degrees | ST slope (INT: - 90 to + 90)          |
| V6. QT Int    | Integer | Continuous  | msec    | QT interval                           |
